1 **Ecological and evolutionary drivers of phenotypic and genetic variation in the European**  
2 **crabapple (*Malus sylvestris* (L.) Mill.), a wild relative of the cultivated apple**

3

4 Chen X.<sup>1</sup>, Avia K.<sup>2</sup>, Forler A.<sup>1</sup>, Remoué C.<sup>1</sup>, Venon A.<sup>1</sup>, Rousselet A., Lucas G.<sup>3</sup>, Kwarteng A.O.<sup>1</sup>,  
5 Rover R.<sup>1</sup>, Le Guilloux M.<sup>1</sup>, Belcram H.<sup>1</sup>, Combes V.<sup>1</sup>, Corti H.<sup>1</sup>, S. Vazquez<sup>1</sup>, Falque M.<sup>1</sup>, G. Alins<sup>4</sup>,  
6 T. Kirisits<sup>5</sup>, Ursu T.M.<sup>6</sup>, Roman, A.<sup>6</sup>, Volk. G.M.<sup>7</sup>, Stéphane Bazot<sup>8</sup>, Cornille A<sup>1</sup>.

7

8 **Affiliations**

9 1. Université Paris Saclay, INRAE, CNRS, AgroParisTech, GQE - Le Moulon, 91190 Gif-sur-Yvette,  
10 France.

11 2. Université de Strasbourg, INRAE, SVQV UMR-A 1131, F-68000 Colmar, France

12 3. Université Paris-Saclay, CEA, CNRS, Institute for Integrative Biology of the Cell (I2BC), Gif-sur-  
13 Yvette 91198, France

14 4. Institut de Recerca i Tecnologia Agroalimentàries, IRTA-Fruit Production, PCiTAL, Parc 21 de  
15 Gardeny, edifici Fruitcentre, 25003 Lleida, Spain

16 5. Institute of Forest Entomology, Forest Pathology and Forest Protection (IFFF), Department of Forest  
17 and Soil Sciences, University of Natural Resources and Life Sciences, Vienna (BOKU), Peter-Jordan-  
18 Straße 82 (Franz Schwackhöfer-Haus), A-1190 Vienna, Austria

19 6. NIRDBS, Institute of Biological Research Cluj-Napoca, 48 Republicii St., Cluj-Napoca, Romania

20 7. USDA-ARS National Laboratory for Genetic Resources Preservation, 1111 S. Mason St., Fort  
21 Collins, Colorado, U.S.A.

22 8. Ecologie Systématique et Evolution, CNRS, AgroParisTech, Ecologie Systématique Evolution,  
23 Université Paris-Saclay, Orsay, France

24

25 corresponding author: [amandine.cornille@cnrs.fr](mailto:amandine.cornille@cnrs.fr)

26

27

28 **Abstract (250 words max with bullet points)**

- 29 ● Characterizing the phenotypic and genetic variation among populations of crop wild relatives  
30 help understanding the ecological and evolutionary processes involved in population  
31 divergence, and better harness their diversity to mitigate the impact of climate change on crops.  
32 We assessed genetic and phenotypic diversity of the European crabapple, *Malus sylvestris*, a  
33 main contributor to the cultivated apple genome (*Malus domestica*), and investigated for  
34 ecological divergence.
- 35 ● We assessed variation in growth rate and traits related to carbon uptake between seedlings  
36 measured in a common garden, and related it to the genetic ancestry of the seedlings, assessed  
37 using 13 microsatellite loci and Bayesian clustering method. The occurrence of patterns of  
38 isolation-by-distance, -by-climate and -by-adaptation that might have caused genetic and  
39 phenotypic differentiation among *M. sylvestris* populations was also tested.
- 40 ● Seedlings belonged to seven *M. sylvestris* populations in Europe, with 11.6% of seedlings  
41 introgressed by *M. domestica*. Significant trait variation among *M. sylvestris* populations was  
42 observed, which for some was of moderate to high heritability. Lack of association between  
43 trait and genetic divergence suggests that this significant phenotypic variation is not adaptive,  
44 but strong association between genetic variation and the climate during the last glacial  
45 maximum suggests local adaptation of *M. sylvestris* to past climates.
- 46 ● This study provides an insight into the ecological and evolutionary drivers of phenotypic and  
47 genetic differentiation among populations of a wild apple species and relative of cultivated  
48 apples, which is a starting point for future breeding programs.

49 **Keywords:** population structure, isolation-by-distance, isolation-by-ecology, local adaptation,  
50 climate change, apple tree, crop wild relatives.

51

52

53 **Societal impact Statement (113 words needs to be reduced to 100)**

54 Apple is a major fruit crop worldwide and a model species for understanding the evolutionary  
55 processes underlying perennial crop domestication. Several wild species have contributed to the  
56 genetic make-up of the cultivated apple, yet phenotypic and genetic diversity data across their  
57 natural distribution is lacking. This study revealed phenotypic variation between populations of the  
58 European crabapple, and showed that both geography, and surprisingly, past but not current climate,  
59 shaped its genetic structure. We provide a starting point for harnessing wild apple diversity for  
60 apple breeding programs to mitigate the impact of climate change on this perennial crop.

61

## 62 **Introduction**

63 Knowledge of the spatial phenotypic and genetic variation among populations is essential for  
64 understanding the ecological (biotic and abiotic) and evolutionary (gene flow, selection, drift, mutation)  
65 processes involved in population divergence and adaptation (Savolainen *et al.*, 2013; Sork, 2018). The  
66 global biodiversity crisis, and its consequences on ecosystem health and services, makes investigating  
67 these questions, and identifying the taxa most vulnerable to anthropogenic change, all the more relevant  
68 (Hoffmann *et al.*, 2021).

69 Plant species distributed across climatic gradients typically experience spatial variation in  
70 selection, genetic drift and gene flow, processes that drive genetic and phenotypic divergence among  
71 populations (Svenning *et al.*, 2015). Climate influence demography such as population expansion and  
72 contraction, the extent of gene flow among populations, and ultimately the extent of genetic divergence  
73 among populations (Edwards *et al.*, 2022). For instance, changes in the climate since the last glacial  
74 maximum (LGM) 20,000 years ago have driven the genetic composition of the European crabapple and  
75 many other tree species (Comes & Kadereit, 1998; Kremer *et al.*, 2002; Pyhäjärvi *et al.*, 2008; Cornille  
76 *et al.*, 2013a; Gugger *et al.*, 2013; Riordan *et al.*, 2016; Lander *et al.*, 2021; Yamada *et al.*, 2021;  
77 Parisod, 2021). Climate can also shape phenotypic variation among populations. Populations occurring  
78 under the same climate may share physiological tolerances to climatic conditions, including plant  
79 carbon uptake via photosynthesis. Carbon uptake traits condition plant size and growth, reproduction  
80 and survival under different climatic conditions (Nicotra *et al.*, 2010; Hartmann *et al.*, 2020). In some  
81 cases, local climate can impose divergent selection on carbon uptake traits and lead to long-term  
82 reduction in gene flow among populations and local adaptation (Keller *et al.*, 2011; Franks *et al.*, 2014;  
83 Aitken & Bemmels, 2015; Ramírez-Valiente *et al.*, 2017; Alexandre *et al.*, 2020). Whether the  
84 phenotypic variation observed in species distributed across large climatic ranges results from their  
85 demographic or adaptive history remains an intense topic of investigation (Li *et al.*, 2012; Tiffin &  
86 Ross-Ibarra, 2014). Furthermore, investigating this question can help predict how plants may respond  
87 to climate change and how species adapt to their environment.

88 There are multiple ways to investigate whether the genetic and phenotypic variation among  
89 populations distributed across climatic gradients results from selection, genetic drift and/or gene flow.  
90 A first step could be to use a common garden experiment to investigate the genetic basis of phenotypic  
91 variation among populations. Indeed, different populations occurring across a climatic gradient may  
92 display clinal variation, *i.e.*, differences in a trait that may be the result of plasticity or local genetic  
93 adaptation (Savolainen *et al.*, 2013; de Villemereuil *et al.*, 2016). Measuring candidate traits for  
94 adaptation to climate, *e.g.*, phenology (Brachi *et al.*, 2013) or traits related to plant carbon uptake  
95 (Savolainen *et al.*, 2013; de Villemereuil *et al.*, 2016) in individuals from different populations under  
96 the same environmental conditions can help elucidate the genetic basis of phenotypic variation across  
97 populations without the confounding effects of the environment. Ideally, common garden should  
98 include the main genetic groups across the species' distribution (de Villemereuil *et al.*, 2020). The

99 association of neutral genotypic variation with ecological variation can also be used as evidence of  
100 adaptive divergence among populations (Shafer & Wolf, 2013; Wang & Bradburd, 2014). The  
101 correlation between neutral genetic differentiation and environmental or phenotypic divergence among  
102 populations, independent of geographic distance, referred to as isolation-by-ecology (IBE), is an  
103 extension of the isolation-by-distance (IBD hereafter) model (Wright, 1943), and has increasingly used  
104 as an indicator of adaptive divergence between populations. In the IBE model, natural selection, which  
105 results from several factors including climate, can indirectly increase neutral genetic and phenotypic  
106 differentiation between populations by promoting general barriers to gene flow (Nosil *et al.*, 2009;  
107 Orsini *et al.*, 2013, p. 201; Shafer & Wolf, 2013; Wang & Bradburd, 2014). The IBE pattern is agnostic  
108 with respect to the underlying processes that generated it (Wang & Bradburd, 2014); this pattern can be  
109 generated by different processes including natural selection against immigrants, sexual selection against  
110 immigrants, reduced hybrid fitness and biased dispersal. Although it can be difficult to map one or more  
111 processes to this pattern, testing for the IBE pattern is valuable for better understanding the ways in  
112 which natural selection shapes neutral genetic and phenotypic variation. Evidence from common garden  
113 experiments and IBE patterns can therefore contribute to understanding how genotypes, phenotypes  
114 and the environment interact to ultimately influence population divergence and potentially local  
115 adaptation.

116 Fruit trees are a major component of terrestrial ecosystems (Petit & Hampe, 2011) and are  
117 grown in managed plantations and orchards to provide a variety of economically important products  
118 (Boyd *et al.*, 2013). Recent breeding efforts have involved the repeated use of a limited number of  
119 cultivars sources of genetic material leading to a reduction in genetic diversity and the loss of valuable  
120 alleles at genes that are not directly targeted by human selection (Myles *et al.*, 2011; Warschefsky &  
121 von Wettberg, 2019; Migicovsky *et al.*, 2021). Wild relatives of crop fruit trees (or “CWR” for crop  
122 wild relative) harbor phenotypic and genetic diversity that are potentially highly valuable for future  
123 breeding programs in the context of climate change (Zhang *et al.*, 2017; Hoban *et al.*, 2018; Hübner &  
124 Kantar, 2021). However, rare of the studies which thoroughly investigate the phenotypic variation of  
125 CWR of fruit trees in relation to response to climate; most studies so far have focused on forest trees  
126 (Kremer & Hipp, 2019). Key traits to study in this context are related to plant carbon uptake. Indeed,  
127 climate impacts plant carbon uptake (Aubin *et al.*, 2016), which latter known to impact fruit quality  
128 characteristics and production (Demestihias *et al.*, 2017). These questions are urgent as native CWRs  
129 can be threatened by crop-to-wild gene flow from nearby domesticated trees (Delplancke *et al.*, 2011;  
130 Cornille *et al.*, 2015; Diez *et al.*, 2015; Feurtey *et al.*, 2017; Flowers *et al.*, 2019; Liu *et al.*, 2019).  
131 Therefore, the study of the genetic and phenotypic variation among populations of CWR fruit tree  
132 species is timely to guide future breeding programs; in addition, it may contribute to our understanding  
133 of the evolutionary and ecological drivers of population divergence, including climate.

134 The European crabapple, *Malus sylvestris* (L.) Mill, is a CWR and a major contributor to the  
135 cultivated apple genome (Cornille *et al.*, 2012, 2014, 2019; Peace *et al.*, 2019). Substantial crop-to-wild

136 gene flow has been observed across *M. sylvestris* populations in Europe (up to 23.1% of natural  
137 populations are introgressed by *M. domestica* (Cornille *et al.*, 2015)). Crop-wild hybrids sampled in a  
138 forest in France and grown in controlled conditions showed superior fitness compared to wild seedlings  
139 (Feurtey *et al.*, 2017). Population genetics analyses also identified five pure (*i.e.*, not introgressed by  
140 *M. domestica*) populations in Scandinavia, western France, eastern France, Eastern Europe and Italy  
141 (Cornille *et al.*, 2015). These five populations resulted from past contractions and expansions associated  
142 with the LGM (Cornille *et al.*, 2013a, 2015). It remains unclear, however, whether these five  
143 populations, distributed across a large area with different climatic conditions, present phenotypic  
144 variation that could be the result of local adaptation to past and/or present climates.

145 We investigated the spatial phenotypic and genetic variation among populations of a major wild  
146 contributor to the cultivated apple, *M. sylvestris*, to test for adaptive divergence. Variation in plant  
147 growth and traits related to carbon uptake was measured in 584 *M. sylvestris* seedlings grown under  
148 controlled conditions and genotyped for 13 microsatellite markers. We first assessed the genetic status  
149 of each seedling (pure *vs.* crop-wild hybrid). Then, we compared growth traits and traits related to plant  
150 carbon uptake among seedlings belonging to different European genetic groups. We also formally tested  
151 the impact of geography (IBD) and ecology (IBE tested with phenotypic traits and climate) on genetic  
152 variation observed from 13 microsatellite markers. We investigated the following questions: 1) Does  
153 growth rate and carbon uptake trait vary between populations of the European crabapple? Are those  
154 traits heritable, and thus can population history predict seedling phenotype?; 2) Is there any association  
155 between phenotypic variation and genetic variation, taking into account geographic distance?; and 3) Is  
156 climate associated with neutral genetic diversity of the European crabapple, which could suggest local  
157 adaptation (*i.e.*, ecological/adaptive divergence)?

158

## 159 **Materials and Methods**

### 160 **Plant material, experimental design and trait measurements**

161 A total of 584 seeds were collected from 90 *M. sylvestris* mother trees (three to 15 seeds per mother  
162 tree, Table S1) from six different geographical regions in Europe: Austria ( $N = 89$ , two sites), Denmark  
163 ( $N = 91$ , three sites), Spain ( $N = 39$ , one site), France ( $N = 220$ , eight sites), Italy ( $N = 32$ , one site),  
164 Romania ( $N = 117$ , seven sites) (Table S1).

165 In mid-April 2019, the 584 seeds were washed, sterilized (in 0.5% chlorine for 20 min), and  
166 vernalized for three months at 4°C in the dark in a mix of damp sand and vermiculite. Then, seeds were  
167 sowed in jiffy pellets and each pellet was randomly placed in a 20-hole array. Seeds were grown in  
168 controlled conditions for two months (from mid-July to mid-September 2019: 22 ±1°C, 60 ±5 %  
169 relative humidity, a 16:8 (L:D) photoperiod and a light level of 40–60 μmol m<sup>-2</sup>.s<sup>-1</sup>). Each 20-hole array  
170 was rotated daily in the growth chamber to avoid any micro-environmental variation in plant response,  
171 and plants were watered weekly.

172 During the course of the two-month experiment, the number of leaves and the height of each seedling  
173 were recorded. Some accessions, due to the low germination rate, could not be recorded (*i.e.*, height  
174 and number of leaves could not be recorded for 19 seedlings out of 584,  $N = 565$ , Table 1). Seedlings  
175 were measured every two or three days, starting from day 7-11 after the start of the experiment.

176 The last week of the experiment, the superficial flavonol and chlorophyll content and the nitrogen  
177 balance index (NBI) were measured in three leaves per seedling. Superficial chlorophyll content is the  
178 concentration of chlorophyll in the leaf epidermis ( $\mu\text{g}/\text{cm}^2$ ), and superficial flavonol content is an index  
179 of the flavonoid concentration ( $\mu\text{g}/\text{cm}^2$ ) in this upper layer and is related to phenol accumulation and  
180 UV protection. Leaf chlorophyll and flavonol content and NBI are parameters correlated with plant  
181 carbon uptake via photosynthesis. Flavonol is a phenolic compound that is also known to contribute to  
182 plant resistance, acclimation and adaptation to environmental constraints through various mechanisms,  
183 including its antioxidant activity. These traits were measured using a portable Dualex device (Force-A,  
184 Orsay, France), which uses a combination of fluorescence signals at various excitation bands to quantify  
185 pigments and chemical compounds. As carbon uptake related traits must be measured in the same day,  
186 a subsample of 257 seedlings out of the 565 seedlings (Table 1, numbers in brackets) was measured  
187 because of time limitation in a day. Seedlings measured for carbon uptake related traits were selected  
188 based on two criteria: having at least one seedling per mother tree and three seedlings per geographic  
189 site.

190

#### 191 **DNA extraction, microsatellite genotyping and genetic ancestry of the seedlings**

192 At the end of the experiment, leaves of each seedling were sampled for microsatellite genotyping.  
193 Genomic DNA was extracted with the NucleoSpin plant DNA extraction kit II (Macherey & Nagel,  
194 Düren, Germany) according to the manufacturer's instructions. Microsatellites were amplified by  
195 multiplex PCR with the Multiplex PCR Kit (QIAGEN, Inc.). We used 13 microsatellite markers,  
196 Ch01f02, Ch01f03, Ch01h01, Ch01h10, Ch02c06, Ch02c09, Ch02c11, Ch02d08, Ch03d07, Ch04c07,  
197 Ch05f06, GD12 and Hi02c07 in four multiplexes (MP01 to MP04; (Cornille *et al.*, 2012)).

198 PCR was performed in a final reaction volume of 15 ml (7.5 ml of QIAGEN Multiplex Master Mix,  
199 10–20 mM of each primer with the forward primer labelled with a fluorescent dye, and 10 ng of template  
200 DNA). We used a touch-down PCR program (initial annealing temperature of 60°C, decreasing by 1°C  
201 per cycle down to 55°C). Genotyping was performed at the GENTYANE platform (INRAE Clermont-  
202 Ferrand) on an ABI PRISM X3730XL, with 2 ml of GS500LIZ size standard (Applied Biosystems).  
203 Alleles were scored with the GENEMAPPER 4.0 software (Applied Biosystems). We retained only  
204 multilocus genotypes presenting less than 10% missing data.

205 Clones or closely related individuals can bias inferences of population structure. We estimated the  
206 kinship coefficient between pairs of individuals ( $F_{ij}$ ) with SPAGeDI 1.5d (Loiselle *et al.*, 1995; Hardy  
207 & Vekemans, 2002), and removed highly genetically related individuals with  $F_{ij} > 0.5$ .

208 The individual-based Bayesian clustering method implemented in STRUCTURE 2.3.3 (Pritchard *et*  
209 *al.*, 2000) was used to estimate the admixture between *M. domestica* and *M. sylvestris*, and the  
210 population genetic structure of *M. sylvestris*. STRUCTURE uses Markov Chain Monte Carlo (MCMC)  
211 simulations to infer the proportion of ancestry of genotypes from  $K$  distinct clusters. The underlying  
212 algorithm attempts to minimize deviations from Hardy–Weinberg and linkage disequilibria.  $K$  ranged  
213 from 1 to 10. Ten independent runs were carried out for each  $K$  and 500,000 MCMC iterations after a  
214 burn-in of 50,000 steps were used. CLUMPAK (Greedy algorithm) (Kopelman *et al.*, 2015) was used  
215 to identify distinct modes in the 10 replicated runs for each  $K$ . STRUCTURE analyses were run for the  
216 full dataset ( $N = 584$ ), plus 40 *M. domestica* genotypes included as a reference for the cultivated apple  
217 gene pool (Cornille *et al.*, 2013b). The R package pophelper v2.3.0 was used (Francis, 2016) to visualize  
218 bar plots. The amount of additional information explained by increasing  $K$  was determined using the  
219  $\Delta K$  statistic (Evanno *et al.*, 2005), as implemented in Structure Harvester (Earl & vonHoldt, 2012).  
220 However,  $\Delta K$  provides statistical support for the strongest but not the finest population structure  
221 (Puechmaille, 2016). Natural populations can display a hierarchical genetic structure with fine-scale  
222 population structure. Visual inspection of the barplots was used to identify the  $K$  value for which all  
223 clusters have well assigned individuals, and where additional clusters at higher  $K$  values do not have  
224 well assigned individuals (indicating that we have reached the highest  $K$  value for which no new genuine  
225 clusters could be delimited). The  $K$  value we therefore considered corresponded to the finest one, which  
226 can be higher than the  $K$  value of the strongest population structure identified by  $\Delta K$ .

227 Using the best  $K$  value inferred with STRUCTURE, we defined  $P_{dom}$ , the membership proportion of  
228 a seedling to the *M. domestica* gene pool; membership coefficients were used to define the genetic  
229 ancestry of each seedling: 1) seedlings with  $P_{dom} > 0.9$ , whose mother tree was likely misidentified in  
230 the field (referred to as “*dom*” hereafter); 2) seedlings with  $P_{dom} > 0.1$ , *i.e.*, crop-wild hybrids (referred  
231 to as “*cw*” hereafter); then 3) seedlings with a membership coefficient  $> 0.9$  to a given wild apple cluster  
232 were considered to be « pure » wild seedlings (referred to as “*pure*” hereafter); and 4) seedlings with a  
233 membership coefficient  $< 0.9$  to a given wild apple gene pool were considered to be wild-wild hybrids  
234 (“*ww*”, hereafter). In addition, “*pure*” seedlings were assigned to different populations (*i.e.*, groups of  
235 seedlings with membership coefficient  $> 0.9$  to a given wild gene pool). Two effects were then tested  
236 using statistical models below: the genetic status effect (*i.e.*, *dom*, *cw*, *ww*, *pure*), and the wild apple  
237 population effect (*i.e.*, corresponding to the “*pure*” populations detected with STRUCTURE).

238

### 239 **Fitness proxy estimates**

240 The fitness of each seedling was therefore estimated from growth and carbon related trait proxies.

241 The absolute growth rate (*AGR* (Radford, 1967)), relative growth rate (*RGR* (Briggs *et al.*, 1920)),  
242 and whole *AGR* were estimated as follows (the traits considered were the height and the number of  
243 leaves of the seedling):

244  $AGR(cm/day) = \frac{(trait_{t+1} - trait_t)}{(date_{t+1} - date_t)} (1)$

245  $RGR(cm/day/day) = \frac{AGR}{date_t} (2)$

246  $WholeAGR(cm/day) = \frac{trait_{end} - trait_{beginning}}{date_{end} - date_{beginning}} (3)$

247 Note that for the whole AGR, the beginning of the experiment corresponded to days 7 and 11 for leaf  
248 and height measurements, respectively, while the last measurement was done at day 60. The *internode*  
249 ratio, which represents the ratio between the number of leaves and the height of the seedling at day 60,  
250 was also considered a fitness trait, as this value plays an important role in apple tree architecture (Ripetti  
251 *et al.*, 2008).

252 Seven fitness proxies were therefore calculated for the full dataset (565 seedlings, Table 1):  
253 *height\_AGR*, *height\_RGR*, *whole\_height\_AGR*, *leaf\_AGR*, *leaf\_RGR*, *whole\_leaf\_AGR* and *internode*.  
254 In addition, chlorophyll (*Chl*) and flavonol (*Flav*) content, and *NBI*, were measured in the subsample  
255 (257 seedlings, Table 1). A preliminary exploration of correlation and variation among phenotypic traits  
256 was carried out using a principal component analysis (PCA) with the FactoMineR R package (Lê *et al.*,  
257 2008).

258

### 259 **Statistical analyses of fitness variation**

260 A previous study demonstrated that crop-to-wild gene flow has an impact on early-stage growth rate  
261 (Feurtey *et al.*, 2017). The effect of the genetic status of seedlings (*i.e.*, *dom*, *cw*, *ww*, *pure*, Table 1) on  
262 fitness variation among seedlings was therefore tested. A linear mixed model was fitted to the data as  
263 follows:

264

265  $Fitness_{ijkl} \sim \mu + \text{wild population of origin}_i + \text{genetic ancestry status}_j + \text{wild population of origin}_i * \text{genetic}$   
266  $\text{ancestry status}_j + \text{mother}_{rk} + e_{ijkl} (4),$

267

268 where  $\mu$  is the overall mean, “wild population of origin” is the fixed effect of the population of origin  
269 of the seedling inferred with STRUCTURE, “status” is the fixed effect of the genetic status of the  
270 seedling (*i.e.*, “*pure*”, “*dom*”, “*ww*”, “*cw*”), the interaction between the two fixed effects, and  
271 “*mother*” is a normally distributed random effect with its own mean and variance parameters, and  $e$  is  
272 the residual. The mother tree of each seedling was used as a random factor to avoid pseudo-replication  
273 due to the presence of multiple half-siblings (*i.e.*, from the same mother tree). We ran the model (4),  
274 but replaced the “status” effect by the “*Pdom*” fixed effect. We gradually removed interactions and  
275 effects depending on their significance. In addition, we evaluated the differences in the effect on trait  
276 variation using a contrast analysis. We fitted the data to the model using the *lm4e* R package (Bates *et*  
277 *al.*, 2015).



278 For fitness proxies defined from the number of leaves (*leaf\_AGR*, *leaf\_RGR* and  
279 *whole\_leaf\_AGR*), a log link function was used and the residual distribution was fitted to a negative  
280 binomial distribution (function *glm.nb* in R package lme4). For fitness proxies defined from the height  
281 of the seedling (*height\_AGR*, *height\_RGR*, *whole\_height\_AGR*), and for chlorophyll and flavonol  
282 content, and *NBI*, a similar linear mixed model was run, but with a residual term that was assumed to  
283 be normally distributed.

284

### 285 **Heritability estimates**

286 Heritability estimates were computed using only pure and wild-wild *M. sylvestris* seedlings detected as  
287 above. We fitted each fitness proxy with a linear mixed model as follows:  $Y_{ijk} = \mu + F_i + C_j + e_{ijk}$  (5),  
288 where  $Y_{ijk}$  is the fitness proxy (growth rate or carbon uptake related trait) of the  $k^{\text{th}}$  seedling belonging  
289 to family  $i$ , member of the  $j^{\text{th}}$  genetic cluster,  $\mu$  the overall fixed mean of the population,  $F_i$  the random  
290 effect of the  $i^{\text{th}}$  family,  $C_j$  the fixed effect of the  $j^{\text{th}}$  genetic cluster and  $e_{ijk}$  the random error term. The  
291 model was fitted using REML (restricted maximum likelihood). Calculations were performed by the  
292 *lme*-function of the R-library *nlme* (Pinheiro *et al.*, 2022). The output of *lme* provides estimates for the  
293 variance components, the corresponding standard deviations (sd), and the best unbiased linear  
294 predictors (BLUP) for random effects. Genetic parameters were then calculated as follows:

295 - the additive genetic variance:  $VA = 4\sigma_F^2$  with  $\sigma_F^2$  representing the between-family variance

296 - the corresponding coefficient of variation:  $CVA = \frac{\sqrt{VA}}{\mu}$

297 - the phenotypic variation:  $VP = \sigma_F^2 + \sigma_E^2$ , with  $\sigma_E^2$  representing the residual variance

298 - the corresponding coefficient of variation:  $CVP = \frac{\sqrt{VP}}{\mu}$

299 - Narrow-sense heritability:  $h^2 = \frac{VA}{VP}$

300 - Dickerson's approximation for its standard deviation:  $sd(h^2) \approx \frac{4sd(\sigma_F^2)}{VP}$

301

### 302 **Test for isolation-by-ecology**

303 Only pure and wild-wild hybrid *M. sylvestris* seedlings were selected for IBE analysis ( $N = 449$ , 21  
304 sites, Table 1). The IBE pattern, *i.e.*, the contribution of climate and phenotypic distances to the genetic  
305 structure taking into account geographical distance, was evaluated using a distance-based redundancy  
306 analysis (db-RDA). db-RDA can be used when the response variable is a distance matrix, here a genetic  
307 distance matrix ( $F_{ST}$ ) across 21 sampled sites, and the explanatory variables are in vector form.  
308 Explanatory variables were as follows : (i) the geographical distance between sampled sites which  
309 underlies an IBD process, represented by vectors with positive eigenvalues of a principal coordinate of  
310 neighbor matrix (*PCNM*) (Borcard & Legendre, 2002), which was applied to the geographical pairwise  
311 distance matrix between sampled sites computed with SPAGeDI 1.5d (Hardy & Vekemans, 2002); 19  
312 bioclimatic variables downloaded from the Worldclim2 database (30s resolution,

313 <https://www.worldclim.org/data/worldclim21.html>) representing annual and seasonal trends and  
314 extremes averaged (ii) over the years 1970-2000 and averaged (iii) for the Pleistocene period (20K  
315 years ago) (Gamisch, 2019), which were used to test for an isolation-by-climate pattern (IBC, hereafter);  
316 and (iv) growth rate ( $N = 551$ , Table 1) and carbon uptake related traits ( $N = 239$ , Table 1) averaged per  
317 site, as well as chlorophyll and flavonoid content, which were used to test for an isolation-by-adaptation  
318 pattern, referred as to IBA hereafter.

319 To identify the variables that explained the genetic structure of *M. sylvestris*, a db-RDA using the  
320 “capscale” function (Oksanen *et al.*, 2014) was run on a full model which included all investigated  
321 variables (*i.e.*, PCNM components, growth rates, carbon uptake related traits, 19 bioclimatic variables).  
322 The best variables were selected for an optimum model with the function “step” based on the Akaike  
323 Information Criterion (AIC). Because db-RDA does not provide information on the relative  
324 contribution of each variable of the model, a variance partitioning analysis was run using the “varpart”  
325 function from the R-package “vegan” (Peres-Neto *et al.*, 2006).

326

## 327 **Results**

### 328 **Genetic ancestry of seedlings**

329 No clones or closely related individuals were detected (Figure S1) and therefore all 584 seedlings were  
330 included in the STRUCTURE analyses.

331 STRUCTURE revealed a clear spatial population genetic structure of *M. sylvestris* in Europe as well  
332 as crop-wild admixture (Figures 1 and S2). For  $K = 2$ , the analysis recovered a group that included *M.*  
333 *domestica* and the western *M. sylvestris* samples (green) and another group that consisted of the Eastern  
334 European samples (red). For  $K = 3$ , the western group was split into two groups, one comprising *M.*  
335 *domestica* and Spanish and Italian *M. sylvestris* seedlings (black), and another comprising the remaining  
336 western samples (green); the Central European group was also recovered. For  $K = 4$ , the Eastern  
337 European samples were split into two groups: an Austrian group and a Romanian group. For  $K = 5$ ,  
338 there was a clear east/west substructure in France. For  $K = 6$ , a sixth cluster comprising the Danish  
339 individuals was found. For  $K = 7$ , the Italian population split into two groups. For  $K = 8$ , the population  
340 from one site in eastern France (*Lor*) was identified as a new cluster. When  $K > 9$ , STRUCTURE did  
341 not reveal any further substructures, with only additional cluster with highly admixed individuals  
342 (Figure S2). Therefore, although the  $\Delta K$  indicated that the most likely  $K$  value was five (Figure S3),  $K$   
343 = 8 was the finest population structure and was therefore retained in subsequent analyses.

344 For  $K = 8$ , we found that the *M. domestica* reference varieties were admixed with the Italian and  
345 Western European *M. sylvestris*. Conversely, we detected 68 *M. sylvestris* seedlings with  $P_{dom} > 0.1$   
346 (considered as crop-wild hybrids), corresponding to 11.6% of the seedlings ( $N = 584$ , Figures 1, S4 and  
347 S5, Table 1). We also found 21 seedlings with a membership coefficient to the *M. domestica* gene pool  
348  $> 0.9$ , corresponding to 4% of the seedlings. Nearly all Spanish seedlings were assigned to the *M.*  
349 *domestica* gene pool with membership coefficients  $> 0.1$  (*i.e.*, 26 crop-wild hybrids and 13 individuals

350 assigned to the *M. domestica* gene pool) and showed admixture only with the wild Italian purple gene  
351 pool (Figure S4). 33 individuals could not be assigned to any cluster (*i.e.*, individuals with a membership  
352 coefficient  $< 0.5$  to any cluster).

353 We therefore identified 68 “*cw*”, 21 “*dom*”, 167 “*ww*” and 282 “*pure*” seedlings (Table 1,  $N = 551$ ).  
354 After removing *cw* hybrids ( $N = 68$ ), seedlings sampled from misidentified mother trees ( $N = 21$ ), the  
355 *M. domestica* reference samples ( $N = 40$ ) and individuals with a membership coefficient  $< 0.5$  to any  
356 cluster, seven wild apple populations (*i.e.*, groups of seedlings with a membership coefficient  $> 0.5$  to  
357 a wild apple cluster) were defined: French Western (“*FR-W*”,  $N = 77$ ), French Eastern (“*FR-E*”,  $N =$   
358 50), French Lorraine (“*FR-Lor*”,  $N = 28$ ), Danish (*DA*,  $N = 78$ ), Italian (“*IT*”,  $N = 27$ ), Austrian (“*AUT*”,  
359  $N = 81$ ) and Romanian (“*RO*”,  $N = 108$ ) (Figure S6). Each *M. sylvestris* population showed a high level  
360 of genetic variation (Table S2). The Romanian population was the most genetically differentiated  
361 population and was close to the Austrian population; the Danish and French Western populations were  
362 genetically similar (Figure S7).

363

#### 364 **No effect of seedling status on phenotypic variation**

365 Variation and correlations among traits are presented in Figures S8 to S11. Heritability estimates were  
366 moderate to high for all traits except growth rate based on leaf number (Table S3). However, these  
367 estimates need to be taken with caution given the limited sample size, as reflected by the large standard  
368 deviations.

369 We did not find any significant effect of seedling status (*i.e.*, *pure*, *ww*, *cw*, *dom*) (Figure 5,  
370 Table S4, Figure S12) or  $P_{dom}$  (Table S5, Figure S13) on phenotypic traits (*i.e.*, leaf and height AGR,  
371 leaf and height RGR, whole leaf and height AGR). We therefore removed the seedling status and  $P_{dom}$   
372 effects from the model 4, as well as *dom* and *cw* individuals. We therefore only considered wild apple  
373 seedlings (*i.e.*, *pure* and *ww*,  $N = 449$ ), and focused on the ‘wild population of origin’ effect (Table S6).  
374

#### 375 **Significant variation in growth rates and chlorophyll content among populations**

376 Mean height variation along the course of the experiment among seedlings from different populations  
377 is shown in Figure 2. There was significant variation among seedlings from different populations in  
378 certain growth-related traits (Table 2). On average, seedlings belonging to the Austrian population were  
379 taller (+11 cm,  $P = 0.047$ ) whereas Romanian (-14.9 cm,  $P = 0.008$ ) and Italian (-18.7 cm,  $P = 0.044$ )  
380 seedlings were shorter (Figure 2) than seedlings from other populations. Seedlings from other  
381 populations did not show a significant difference in height. In addition, the number of leaves and height  
382 traits were negatively correlated,  $r = -0.3$ ,  $P < 0.001$ ). The Austrian population presented the lowest  
383 number of leaves (average = 5,  $sd = 4$ ) whereas seedlings belonging to the Romanian population had  
384 the highest number of leaves (average = 8,  $sd = 7$ , Figure S15). The Romanian population also had the  
385 largest *internode* (+ 0.02 leaf/cm,  $P = 0.024$ ).

386 Chlorophyll content differed among populations with seedlings from the Italian population  
387 producing on average more chlorophyll (+4.14  $\mu\text{g}/\text{cm}^2$ ,  $P = 0.039$ , Figure S16) than seedlings from  
388 other populations. Flavonol content and NBI did not differ significantly among populations.

389

### 390 **Significant IBD and IBC**

391 Correlation plots between bioclimatic variables are provided in Figures S17 and S18; however, all  
392 variables were included in the analysis as db-RDA can cope with correlated variables. The optimal  
393 model was chosen according to its best AIC value. The optimal model explained up to 25.9% of the  
394 genetic structure ( $Adj-R^2 = 69.9\%$ ,  $P = 0.001$ ) and contained seven variables (four geographic and three  
395 bioclimatic variables) (Table 3): the geographical distance is represented by the 1st, 2nd, 3rd and 6th  
396 axis of the PCNM analysis and three past climatic variables (Bio3: isothermality; Bio6: minimum  
397 temperature of coldest month; Bio 9: mean temperature of driest quarter). In total, IBD explained 47%  
398 of the variance of the wild apple tree population genetic structure, whereas IBC explained 22% (Figure  
399 3). Taking geographical distance into account, we did not find a pattern of IBA i.e., covariation between  
400 phenotype and genetic divergences.

401

### 402 **Discussion**

403 This study is the first to take into account the population genetic structure as well as the phenotypic  
404 variation of a contributor to the cultivated apple genome (Cornille *et al.*, 2012), to investigate ecological  
405 divergence. Bayesian clustering revealed seven *M. sylvestris* populations across Europe with a  
406 substantial number of seedlings (11.6%, mainly from Western Europe) introgressed by *M. domestica*,  
407 although this figure is less substantial than previously reported (Cornille *et al.*, 2013b, 2015; Feurtey *et*  
408 *al.*, 2017). Although the crop-wild hybrid status of seedlings did not impact phenotypic variation, we  
409 observed phenotypic variation among crabapple populations when grown in controlled conditions.  
410 Phenotypic variation was found for growth and chlorophyll content among populations of the European  
411 crabapple from different climates in Europe. Based on the IBA pattern, this phenotypic variation was  
412 not adaptive. However, the IBC pattern revealed that climate was a driver of genetic differentiation  
413 between populations. Given that the IBC pattern was still found after accounting for IBD, this implies  
414 that there are sufficient levels of local adaptation to LGM climate to reduce gene flow among  
415 populations. The European crabapple may therefore be locally adapted to the past climate conditions of  
416 the LGM. The lack of signal of adaptive phenotypic divergence suggests that traits other than the ones  
417 we investigated in this study may be under divergent selection. The results of this study pinpoints  
418 adaptive divergence related to climate in a wild contributor to a fruit tree crop genome, which is a  
419 starting point for future breeding programs and mitigating the impact of climate change of CWR of an  
420 emblematic temperate fruit tree.

421

### 422 **Ongoing crop-to-wild gene flow in the European crabapple**

423 We revealed substantial gene flow from *M. domestica* to the European crabapple, with 11.8% of  
424 seedlings, mostly from Western Europe, introgressed by *M. domestica*. Introgression rates were lower  
425 compared to previous studies (*i.e.*, 37% in Cornille *et al.* (2013b) and 23.1% in Cornille *et al.* (2015)).  
426 However, these studies genotyped more mother trees (*i.e.*,  $N = 756$  and  $N = 1,889$ , respectively), which  
427 could explain the difference in estimates of crop-to-wild gene flow. The results described here highlight  
428 the fact that crop-to-wild gene flow is still ongoing in the European crabapple. The Spanish seedlings  
429 sampled here were the progeny of trees growing in a location that is known to have high levels of *M.*  
430 *domestica* introgression (pers. comment. G. Alins). It is even possible that the mother trees of these  
431 seedlings were *M. domestica* and not *M. sylvestris*. The inclusion of reference cultivated apple samples  
432 mainly from Western Europe may decrease the probability of detecting crop-to-wild introgression  
433 events in wild populations from Eastern and Northern Europe. The lower crop-to-wild introgression  
434 rates in wild seedlings from Eastern Europe can also be explained by their physical distance from  
435 cultivated apple orchards. Indeed, distance can be a natural barrier to hybridization between *M.*  
436 *domestica* and its wild relative (Larsen *et al.*, 2016), which we confirmed in this study. The position of  
437 a *M. sylvestris* individual in a forest may also impact its level of introgression. Indeed, *M. sylvestris*  
438 trees are often found in forest gaps and at the forest edge, corresponding to their ecophysiological  
439 preferences (*i.e.*, preference for light and low competition). The effect of the location of the trees in the  
440 forest on the level of crop-to-wild introgression needs to be studied further.

441 The consequences of crop-wild introgression on phenotypic variation between crop and wild  
442 individuals have been studied more in annual crops (*e.g.*, maize, wheat, lettuce, rice) (Ellstrand *et al.*,  
443 2013) than in perennial fruit trees. One study has shown that crop-wild hybrid seedlings of the European  
444 crabapple have higher growth rates and showed earlier germination than wild apple seedlings (Feurtey  
445 *et al.*, 2017). We did not detect any effect of the status of a seedling (pure, wild, crop-wild, dom) or the  
446 level of introgression (*Pdom*) on growth and carbon uptake related fitness proxies. This could be due to  
447 the low number of samples from the *cw* and *dom* categories. Note that we did not test the variation in  
448 germination rate among seedlings as germination can be strongly impacted by stratification conditions.

#### 449 450 **No adaptive phenotypic variation among populations, but signs of local adaptation to past climate** 451 **in the European crabapple**

452 Under controlled conditions, seedlings from the different populations were found to have significantly  
453 different growth and morphology, but IBA analyses indicated that this variation was likely not adaptive.  
454 Seedlings belonging to the Austrian population were the tallest, had the highest absolute growth rate  
455 and the lowest number of leaves; by contrast, Romanian seedlings were the shortest, had the lowest  
456 absolute growth rate and the highest number of leaves. Italian seedlings had the highest chlorophyll  
457 content. The seedlings belonging to the Austrian population may be fitter in the climate conditions  
458 simulated in this experiment. We tested whether this phenotypic variation was adaptive. However,  
459 taking geographic distance into account, we did not find any significant covariation between genetic

460 and phenotypic variation. This suggests a lack of divergent selection on traits related to carbon uptake  
461 or growth that are often associated with plant responses to climate (Bussotti *et al.*, 2015). Therefore,  
462 the phenotypic variation we observed among populations under controlled conditions may be the result  
463 of genetic drift alone; alternatively, the traits we selected (thought to be related to responses to climate)  
464 are not good candidates for investigating divergent selection. Leaf mass per area (LMA) and foliar  
465 nitrogen content demonstrated can be future targeted parameter to assess the responses of apple seedling  
466 to environmental stress (Bussotti *et al.*, 2015). Another explanation could be that we did not phenotype  
467 enough seedlings from each genetic group. Indeed, we observed a high variation in each phenotypic  
468 trait and in their heritability estimates, suggesting that the traits we studied may be relevant but that a  
469 larger number of seedlings should be phenotyped and analyzed (*e.g.*, (Klein *et al.*, 1973)). However,  
470 some studies have found that even with large sample sizes, the standard error of heritability estimates  
471 can still be large and vary greatly between experimental designs (Visscher & Goddard, 2015). The fairly  
472 high heritability estimates for most of the traits considered here could be seen as consistent with rather  
473 weak within population selection, enabling the maintenance of ample additive genetic variation  
474 (Wheelwright *et al.*, 2014). Furthermore, high variation in seedling traits combined with high  
475 heritability estimates could suggest that there is large room of genetic material for adaptation to work  
476 on. In addition, the population of origin of the seedlings did not explain all phenotypic variation. Even  
477 though we found an effect of the population of origin on phenotypic traits, its contribution was relatively  
478 low (*e.g.*, model 4,  $R^2$  for height = 0.119, and  $R^2$  for height AGR= 0.047). Environment (*e.g.*, climate)  
479 and interaction between genotype and environment could also impact fitness.

480         As *M. sylvestris* is distributed across gradient, we further investigated the role of climate in  
481 shaping the genetic variation among populations of the European crabapple, without considering  
482 phenotypic trait variation. We tested for an IBE pattern, where the pattern of neutral genetic variation  
483 covaries with ecological variables (here climate). There was no combined effect of geographic and  
484 climatic distance (IBD  $\cap$  IBC), which allowed us to assess the contribution of these processes separately  
485 (Wang & Bradburd, 2014). We showed that IBD and IBC played a significant role ( $R^2_{\text{adj}} = 47\%$  and  
486  $R^2_{\text{adj}} = 22\%$ , respectively) on the genetic differentiation of European crabapple populations. Weak but  
487 significant IBD has been previously identified in wild apple relatives of the cultivated apple (*i.e.*, *M.*  
488 *sylvestris*, *M. orientalis* and *M. sieversii*) suggesting they have high dispersal capacities (Cornille *et al.*,  
489 2013b,a, 2015). Weak IBD is explained by self-incompatibility systems that prevent self-fertilization  
490 (Brown, 1992), pollen dispersal by bees and flies (*Syrphidae*) and endozoochorous seed dispersal by  
491 large mammals such as ungulates, wild pigs, brown bears or humans (Larsen *et al.*, 2006). We show  
492 that in addition to IBD, IBC persisted after taking geographic distance into account. Climate can impose  
493 divergent selection pressures on different locations and thus reduce gene flow between populations, so  
494 that IBC contributes to genetic differentiation. The main variables explaining genetic differentiation in  
495 the European crabapple were related to temperature during the LGM. This suggests that the European  
496 crabapple may be locally adapted to its past temperature but not to its current climate. Local adaptation

497 to current climate is well studied in wind-dispersed trees (Savolainen *et al.*, 2013; Kremer & Hipp,  
498 2019; Pyhäjärvi *et al.* 2020). However, to our knowledge no study has shown local adaptation to past  
499 climate conditions in a tree species.

500 Additional factors other than climate can also shape adaptive divergence between populations.  
501 *Malus sylvestris* is a pioneer species that needs high levels of light and is not very competitive. Local  
502 adaptation to biotic factors such as the presence of other species is possible. Competition for light with  
503 other species such as the European beech (*Fagus sylvatica*) could be a source of divergence between  
504 populations. Local adaptation of fruit trees to biotic factors, including parasites (Olvera-Vazquez *et al.*,  
505 2021), deserves further investigations. Besides selection, the potential role of phenotypic plasticity in  
506 enabling growth and optimal fitness in changing environments also needs to be carefully evaluated  
507 (Benito Garzón *et al.*, 2011).

508

### 509 **Further investigations needed on local adaptation and plasticity in response to climate in the** 510 **European crabapple**

511 Our study raises concerns regarding the future of wild apple populations and their current vulnerability  
512 to current climate change. However, the adaptation of tree species to climate remains complex (Bussotti  
513 *et al.*, 2015). For instance, in *Eucalyptus camaldulensis*, variation in leaf traits and performance proxies  
514 was unrelated to the climate of genotype provenance (Asao *et al.*, 2020), whereas variation in several  
515 photosynthetic traits was clearly related to the climate of genotype provenance across Australia (Dillon  
516 *et al.*, 2018). In contrast, collective differences in leaf morphology and photosynthetic physiology, in  
517 several *Populus* species may be adaptive for differences in growth season length, temperature and  
518 insolation (Keller *et al.*, 2011; Kaluthota *et al.*, 2015). Further investigations on local adaptation and  
519 plasticity to climate or biotic factors in the European crabapple are therefore needed. Genomic data will  
520 be particularly useful for determining the relative influence of adaptive and neutral processes on  
521 climate- or biotic- driven divergence by screening genomes from different populations in Europe.  
522 Comparing the fitness of seedlings from different populations in reciprocal transplants will also be  
523 important to further test for local adaptation. Our study therefore raises questions regarding the  
524 processes of local adaptation of fruit trees, and is a starting point for apple breeding programs.

525

### 526 **Acknowledgements**

527 We thank the Laboratoire d'Excellence BASC (Biodiversité, Agroécosystèmes, Société, Climat), the  
528 Institut Diversité Écologie et Évolution du Vivant (IDEEV), the European LEADER program and  
529 ATIP-Avenir CNRS Inserm for funding. We are grateful to the INRAE MIGALE bioinformatics  
530 platform (<http://migale.jouy.inra.fr>) for providing help and support, in particular Véronique Martin, Eric  
531 Montaubon and Valentin Loux. We also thank Adrien Falce, Olivier Langella and Benoit Johannet for  
532 help and support on the INRAE Génétique Quantitative et Evolution- Le Moulon lab cluster and the  
533 Plateforme de Génotypage GENTYANE INRAE UMR 1095. We thank Einar Flensted-Jensen, Michel

534 Bonnessee, Alberto Dominici, Jean-Luc Ricaud, Eric Wolff, Alain Guinet, Line Caminade, for  
535 providing seeds, Richard Le Menn, Bernard Gambier. *USDA* is an equal opportunity provider,  
536 employer, and lender. Mention of trade names or commercial products is solely for the purpose of  
537 providing specific information and does not imply recommendation or endorsement by the U.S.  
538 Department of Agriculture. AR and TU were partly funded through project PN2019-2022/19270201 –  
539 BIODIVERS 3.

540

#### 541 **Authors contributions**

542 AC, GV, AR, SB, TU conceived and designed the experiments; AC, GV, AT, TU, TK obtained the  
543 funding; AC, GV, AT, TU, KAO, SV, RR, XC, TK, CR sampled the material; XC, CR, AV, AR, GL,  
544 KAO, RR, MLG, HB, VC, HC, SV, MF performed the molecular biology analyses; AC, AF, KomAvi  
545 and XC analyzed the data. The manuscript was written by AC, KomAvi and AF, with essential input  
546 from other co-authors.

547

548



## Figures and Tables

**Figure 1. Bayesian clustering of the *Malus sylvestris* seedlings sampled in this study ( $N = 584$ ) and the reference samples of *Malus domestica* ( $N = 40$ ) inferred with STRUCTURE for  $K = 8$ , and its associated map of mean membership per sampled site.** Each individual is represented by a vertical bar partitioned into clusters. Visualization was improved by sorting genotypes by country; countries are separated by a white line. The reference *M. domestica* reference samples are shown on the far left of the map in the Atlantic. Circle size is proportional to the number of individuals within the cluster (scale shown on the top right-hand corner).

**Figure 2. Mean height of apple seedlings measured over the time of the experiment in controlled conditions** (including pure and wild-wild hybrid seedlings,  $N = 449$ , and seedlings assigned to the *M. domestica* gene pool,  $N = 21$ , as detected with STRUCTURE for  $K=8$ ). The 40 reference *M. domestica* individuals were not measured under controlled conditions thus are not shown here. Vertical lines represent the standard deviation. Populations: AUT ( $N = 81$ ), DA ( $N = 78$ ), DOM ( $N = 21$ , includes 13 Spanish genotypes and seedlings from other countries), FR-E ( $N = 50$ ), FR-Lor ( $N = 28$ ), FR-W ( $N = 77$ ), IT ( $N = 27$ ), RO ( $N = 108$ ).

**Figure 3. Variance partitioning analysis of the db-RDA results obtained for *Malus sylvestris* ( $N_{sites} = 21$ , 13 microsatellite markers).** Variation of the site pairwise genetic differentiation ( $F_{ST}$ ) is explained by the variables generating isolation-by-distance (geographical distance) and isolation-by-climate (with three bioclimatic variables during the last glacial maximum: Bio3, isothermality; Bio6, minimum temperature of coldest month; Bio 9: mean temperature of driest quarter).



**Table 1. Number of *M. sylvestris* seedlings used in this study for population genetic analyses inferred with STRUCTURE for  $K = 8$  with 13 microsatellite markers and phenotyping (growth and carbon-uptake related traits).**

| Clusters                                       | $N_{pure}$ | $N_{ww}$ | $N_{cw}$ | $N_{dom}$ | $N_{no\ cluster}$ | Total measured for phenotypic traits | Wild population name |
|------------------------------------------------|------------|----------|----------|-----------|-------------------|--------------------------------------|----------------------|
| Q1 (light green)                               | 32         | 46       | 7        | 0         | 10                | 92                                   | FR-W                 |
| Q2 (yellow)                                    | 0          | 52       | 5        | 0         | 4                 | 57                                   | FR-E                 |
| Q3 (lor)                                       | 28         | 1        | 0        | 0         |                   | 28                                   | FR-Lor               |
| Q4 (blue)                                      | 61         | 21       | 1        | 0         | 6                 | 85                                   | DA                   |
| Q5 (purple)                                    | 23         | 4        | 3        | 0         | 4                 | 34                                   | IT                   |
| Q6 (dark green)                                | 66         | 17       | 1        | 0         | 1                 | 83                                   | AUT                  |
| Q7 (red)                                       | 77         | 34       | 5        | 0         | 0                 | 113                                  | RO                   |
| Q8 (black – <i>M. domestica</i> )              | 40         | 0        | 46       | 21        | 8                 | 73                                   | -                    |
| Total                                          | 287        | 175      | 68       | 21        | 33                | 551 (584)                            |                      |
| Total measured for height and number of leaves | 282        | 167      | 63       | 21        | 32                | 533 (565)                            |                      |

|                                                                |     |    |    |   |    |           |
|----------------------------------------------------------------|-----|----|----|---|----|-----------|
| Total measured for leaf chlorophyll, flavonol and NBI contents | 129 | 82 | 22 | 6 | 18 | 239 (257) |
|----------------------------------------------------------------|-----|----|----|---|----|-----------|

$N_{pure}$ : number of seedlings assigned to a wild gene pool with a membership coefficient  $> 0.9$ ;  $N_{ww}$ , number of wild-wild hybrids (*i.e.*, seedlings with a membership coefficient  $> 0.1$  to a wild gene pool other than its own wild gene pool and a membership coefficient  $< 0.1$  to the *M. domestica* gene pool);  $N_{cw}$ : number of crop-wild hybrids (*i.e.*, seedling assigned to the *M. domestica* gene pool with a membership coefficient  $> 0.1$ ).  $N_{no\ cluster}$ : seedlings that could not be assigned to any defined gene pool; Total measured for phenotypic traits : number of individuals measured for each phenotypic trait and included in the statistical analyses, the number in brackets represents the initial sample size before data were filtered for statistical analyses. Wild population name: populations defined with STRUCTURE at  $K=8$  excluding crop-wild hybrids and seedlings from misidentified mother trees (*i.e.*, including only wild pure and wild-wild hybrids).

**Table 2. Final model depicting effects of the *Malus sylvestris* population to which each seedling belonged (*i.e.*, cluster inferred with STRUCTURE at  $K=8$ ) on phenotypic traits (*i.e.*, height, number of leaves, internode, chlorophyll and flavonol content, NBI) measured in 533 individuals. Variables in green are significant ( $P < 0.05$ ).**

| Explanatory variable | Cluster  |                |    | Mother |                    | Model  |                |                          | Mother         |
|----------------------|----------|----------------|----|--------|--------------------|--------|----------------|--------------------------|----------------|
|                      | $\chi^2$ | <i>P-value</i> | df | REML   | Standard Deviation | AIC    | R <sup>2</sup> | Corrected R <sup>2</sup> | R <sup>2</sup> |
| Height_AGR           | 17.863   | 0.007***       | 6  | 1,229  | 0.204              | 1248   | 0.047          | 0.091                    | 0.044          |
| Height_RGR           | 12.846   | 0.045*         | 6  | -2,264 | 0.006              | -2245  | 0,041          | 0.147                    | 0.106          |
| Leaf_AGR             | -        | -              | -  | -      | -                  | -      | -              | -                        | -              |
| Leaf_RGR             | -        | -              | -  | -      | -                  | -      | -              | -                        | -              |
| Height whole AGR     | 22.243   | 1.00e-03***    | 6  | 630    | 0.175              | 650    | 0.074          | 0.192                    | 0.118          |
| Leaf whole AGR       | 36.326   | 2.38e-06***    | 6  | -1,277 | 0.009              | -1,258 | 0.09           | 0.118                    | 0.028          |

|                           |        |             |   |        |       |        |       |       |       |
|---------------------------|--------|-------------|---|--------|-------|--------|-------|-------|-------|
| Height                    | 31.623 | 1.93e-05*** | 6 | 4,113  | 11.69 | 4,131  | 0.119 | 0.301 | 0.182 |
| Number of leaves          | 22.285 | 0.001***    | 6 | -      | 0.084 | 2,659  | 0.052 | 0.064 | 0.012 |
| Chlorophyll               | 14.418 | 0.025*      | 6 | 1,181  | 1.352 | 1,199  | 0.074 | 0.171 | 0.097 |
| Flavonol                  | -      | -           | 6 | -      | -     | -      | -     | -     | -     |
| NBI                       | -      | -           | 6 | -      | -     | -      | -     | -     | -     |
| Internode (nleaf/height ) | 17.768 | 0.007***    | 6 | -1,328 | 0.009 | -1,309 | 0.044 | 0.073 | 0.029 |

\*\*\*: P-value <0.001; \*\*: 0.01 < P-value <0.001; \*: 0.05 < P-value <0.01; AIC: Akaike Indice Criterion.

**Table 3. Contribution of geography and climate to the genetic variation observed among *M. sylvestris* seedlings. Distance-based redundancy analyses tested the effects of geography, climate and phenotype on genetic differentiation among 21 sites from 13 microsatellites in the European crabapple. Only significant variables are presented.**

|                              | db-RDA                  |      |         |                    |
|------------------------------|-------------------------|------|---------|--------------------|
|                              | % of variance explained | d.f. | p-value | Adj-R <sup>2</sup> |
| <b>Global analysis</b>       | 25.9                    | 7    | 0.001   | 69.9               |
| Residuals                    | 11.3                    | 13   | -       |                    |
| <b>Marginal test</b>         |                         |      |         |                    |
| <i>Geography (IBD)</i>       | 14.9                    | 4    | <0.015  |                    |
| PCNM 1-2-3-6                 |                         |      |         |                    |
| <i>Environment (IBC_LGM)</i> | 11.04                   | 3    | <0.015  |                    |
| BIO3_LGM                     |                         |      |         |                    |
| BIO6_LGM                     |                         |      |         |                    |
| BIO9_LGM                     |                         |      |         |                    |
| Interaction                  |                         |      | -       |                    |

|           |       |   |   |  |
|-----------|-------|---|---|--|
| Residuals | 11.3% | - | - |  |
|-----------|-------|---|---|--|

BIO3\_LGM: isothermality (BIO2/BIO7) ( $\times 100$ ); BIO6\_LGM: minimum temperature of coldest month; BIO9\_LGM: mean temperature of driest quarter, IBD: isolation-by-distance; IBC\_LGM: isolation-by-climate during the last glacial maximum.



## References

- Aitken SN, Bemmels JB. 2015.** Time to get moving: assisted gene flow of forest trees. *Evolutionary applications* **9**: 271–290.
- Alexandre H, Truffaut L, Klein E, Ducouso A, Chancerel E, Lesur I, Dencausse B, Louvet J-M, Nepveu G, Torres-Ruiz JM, et al. 2020.** How does contemporary selection shape oak phenotypes? *Evolutionary Applications* **13**: 2772–2790.
- Asao S, Hayes L, Aspinwall MJ, Rymer PD, Blackman C, Bryant CJ, Cullerne D, Egerton JJG, Fan Y, Innes P, et al. 2020.** Leaf trait variation is similar among genotypes of *Eucalyptus camaldulensis* from differing climates and arises in plastic responses to the seasons rather than water availability. *New Phytologist* **n/a**.
- Aubin I, Munson AD, Cardou F, Burton PJ, Isabel N, Pedlar JH, Paquette A, Taylor AR, Delagrangé S, Kebli H, et al. 2016.** Traits to stay, traits to move: a review of functional traits to assess sensitivity and adaptive capacity of temperate and boreal trees to climate change. *Environmental Reviews* **24**: 164–186.
- Bates D, Mächler M, Bolker B, Walker S. 2015.** Fitting linear mixed-effects models using lme4. *Journal of Statistical Software, Articles* **67**: 1–48.
- Borcard D, Legendre P. 2002.** All-scale spatial analysis of ecological data by means of principal coordinates of neighbour matrices. *Ecological Modelling* **153**: 51–68.
- Boyd IL, Freer-Smith PH, Gilligan CA, Godfray HCJ. 2013.** The Consequence of Tree Pests and Diseases for Ecosystem Services. *Science* **342**.
- Brachi B, Villoutreix R, Faure N, Hautekèete N, Piquot Y, Pauwels M, Roby D, Cuguen J, Bergelson J, Roux F. 2013.** Investigation of the geographical scale of adaptive phenological variation and its underlying genetics in *Arabidopsis thaliana*. *Molecular Ecology* **22**: 4222–4240.
- Briggs AW, Kidd F, West C. 1920.** A quantitative analyses of plant growth: part II. *Annals of Applied Biology* **7**: 202–223.
- Brown SK. 1992.** Genetics of apple. In: Plant breeding reviews vol 9. John Wiley & Sons New York, 333–366.
- Bussotti F, Pollastrini M, Holland V, Brüggemann W. 2015.** Functional traits and adaptive capacity of European forests to climate change. *Environmental and Experimental Botany* **111**: 91–113.
- Comes HP, Kadereit JW. 1998.** The effect of Quaternary climatic changes on plant distribution and evolution. *Trends in Plant Science* **3**: 432–438.
- Cornille A, Antolín F, Garcia E, Vernesi C, Fietta A, Brinkkemper O, Kirleis W, Schlumbaum A, Roldán-Ruiz I. 2019.** A Multifaceted Overview of Apple Tree Domestication. *Trends in Plant Science* **24**: 770–782.
- Cornille A, Feurtey A, Gélín U, Ropars J, Misvanderbrugge K, Gladieux P, Giraud T. 2015.** Anthropogenic and natural drivers of gene flow in a temperate wild fruit tree: A basis for conservation and breeding programs in apples. *Evolutionary Applications* **8**: 373–384.
- Cornille A, Giraud T, Bellard C, Tellier A, Le Cam B, Smulders MJM, Kleinschmit J, Roldan-Ruiz I, Gladieux P. 2013a.** Post-glacial recolonization history of the European crabapple (*Malus sylvestris* Mill.), a wild contributor to the domesticated apple. *Molecular Ecology* **22**: 2249–63.

**Cornille A, Giraud T, Smulders MJM, Roldán-Ruiz I, Gladieux P. 2014.** The domestication and evolutionary ecology of apples. *Trends in Genetics* **30**: 57–65.

**Cornille A, Gladieux P, Giraud T. 2013b.** Crop-to-wild gene flow and spatial genetic structure in the wild closest relatives of the cultivated apple. *Evolutionary Applications* **6**: 737–748.

**Cornille A, Gladieux P, Smulders MJM, Roldán-Ruiz I, Laurens F, Le Cam B, Nersesyan A, Clavel J, Olonova M, Feugey L, et al. 2012.** New insight into the history of domesticated apple: secondary contribution of the European wild apple to the genome of cultivated varieties. *PLoS Genet* **8**: e1002703.

**Delplancke M, Alvarez N, Espíndola A, Joly H, Benoit L, Brouck E, Arrigo N. 2011.** Gene flow among wild and domesticated almond species: insights from chloroplast and nuclear markers. *Evolutionary Applications* **5**: 317–329.

**Demestihis C, Plénet D, Génard M, Raynal C, Lescouret F. 2017.** Ecosystem services in orchards. A review. *Agronomy for Sustainable Development* **37**: 12.

**Diez CM, Trujillo I, Martinez-Urdiroz N, Barranco D, Rallo L, Marfil P, Gaut BS. 2015.** Olive domestication and diversification in the Mediterranean Basin. *New Phytologist* **206**: 436–447.

**Dillon S, Quentin A, Ivković M, Furbank RT, Pinkard E. 2018.** Photosynthetic variation and responsiveness to CO<sub>2</sub> in a widespread riparian tree. *PLOS ONE* **13**: e0189635.

**Earl DA, vonHoldt BM. 2012.** STRUCTURE HARVESTER: a website and program for visualizing STRUCTURE output and implementing the Evanno method. *Conservation Genetics Resources* **4**: 359–361.

**Edwards SV, Robin VV, Ferrand N, Moritz C. 2022.** The Evolution of Comparative Phylogeography: Putting the Geography (and More) into Comparative Population Genomics. *Genome Biology and Evolution* **14**: evab176.

**Ellstrand NC, Meirmans P, Rong J, Bartsch D, Ghosh A, de Jong TJ, Haccou P, Lu B-R, Snow AA, Neal Stewart C, et al. 2013.** Introgression of Crop Alleles into Wild or Weedy Populations. *Annual Review of Ecology, Evolution, and Systematics* **44**: 325–345.

**Evanno G, Regnaut S, Goudet J. 2005.** Detecting the number of clusters of individuals using the software STRUCTURE: a simulation study. *Molecular Ecology* **14**: 2611–2620.

**Feurtey A, Cornille A, Shykoff JA, Snirc A, Giraud T. 2017.** Crop-to-wild gene flow and its fitness consequences for a wild fruit tree: Towards a comprehensive conservation strategy of the wild apple in Europe. *Evolutionary Applications* **10**: 180–188.

**Flowers JM, Hazzouri KM, Gros-Balthazard M, Mo Z, Koutroumpa K, Perrakis A, Ferrand S, Khierallah HSM, Fuller DQ, Aberlenc F, et al. 2019.** Cross-species hybridization and the origin of North African date palms. *Proceedings of the National Academy of Sciences* **116**: 1651–1658.

**Francis R. 2016.** POPHELPER: An R package and web app to analyse and visualise population structure. *Molecular Ecology Resources* **17**: n/a-n/a.

**Franks SJ, Weber JJ, Aitken SN. 2014.** Evolutionary and plastic responses to climate change in terrestrial plant populations. *Evolutionary Applications* **7**: 123–139.

**Gamisch A. 2019.** Oscillayers: A dataset for the study of climatic oscillations over Plio-Pleistocene time-scales at high spatial-temporal resolution. *Global Ecology and Biogeography* **28**: 1552–1560.

- Gugger PF, Ikegami M, Sork VL. 2013.** Influence of late Quaternary climate change on present patterns of genetic variation in valley oak, *Quercus lobata* Née. *Molecular Ecology* **22**: 3598–3612.
- Hardy OJ, Vekemans X. 2002.** SPAGeDI: a versatile computer program to analyse spatial genetic structure at the individual or population levels. *Molecular Ecology Notes* **2**: 618–620.
- Hartmann H, Bahn M, Carbone M, Richardson AD. 2020.** Plant carbon allocation in a changing world – challenges and progress: introduction to a Virtual Issue on carbon allocation. *New Phytologist* **227**: 981–988.
- Hoban S, Volk G, Routson KJ, Walters C, Richards C. 2018.** Sampling Wild Species to Conserve Genetic Diversity. In: Greene SL, Williams KA, Houry CK, Kantar MB, Marek LF, eds. North American Crop Wild Relatives, Volume 1: Conservation Strategies. Cham: Springer International Publishing, 209–228.
- Hoffmann AA, Weeks AR, Sgrò CM. 2021.** Opportunities and challenges in assessing climate change vulnerability through genomics. *Cell* **184**: 1420–1425.
- Hübner S, Kantar MB. 2021.** Tapping Diversity From the Wild: From Sampling to Implementation. *Frontiers in Plant Science* **12**: 38.
- Kaluthota S, Pearce DW, Evans LM, Letts MG, Whitham TG, Rood SB. 2015.** Higher photosynthetic capacity from higher latitude: foliar characteristics and gas exchange of southern, central and northern populations of *Populus angustifolia*. *Tree Physiology* **35**: 936–948.
- Keller SR, Soolanayakanahally RY, Guy RD, Silim SN, Olson MS, Tiffin P. 2011.** Climate-driven local adaptation of ecophysiology and phenology in balsam poplar, *Populus balsamifera* L. (Salicaceae). *American Journal of Botany* **98**: 99–108.
- Kopelman NM, Mayzel J, Jakobsson M, Rosenberg NA, Mayrose I. 2015.** Clumpak: a program for identifying clustering modes and packaging population structure inferences across K. *Molecular Ecology Resources* **15**: 1179–1191.
- Kremer A, Hipp AL. 2019.** Oaks: an evolutionary success story. *New Phytologist* **226**: 943–946.
- Kremer A, Kleinschmit J, Cottrell J, Cundall EP, Deans JD, Ducouso A, König AO, Lowe AJ, Munro RC, Petit RJ, et al. 2002.** Is there a correlation between chloroplast and nuclear divergence, or what are the roles of history and selection on genetic diversity in European oaks? *Range wide distribution of chloroplast DNA diversity and pollen deposits in European white oaks: inferences about colonisation routes and management of oak genetic resources* . **156**: 75–87.
- Lander TA, Klein EK, Roig A, Oddou-Muratorio S. 2021.** Weak founder effects but significant spatial genetic imprint of recent contraction and expansion of European beech populations. *Heredity* **126**: 491–504.
- Larsen B, Ørgaard M, Toldam-Andersen TB, Pedersen C. 2016.** A high-throughput method for genotyping S-RNase alleles in apple. *Molecular breeding: new strategies in plant improvement* **36**: 24–24.
- Lê S, Josse J, Husson F. 2008.** FactoMineR: An R Package for Multivariate Analysis. *Journal of Statistical Software* **25**: 1–18.
- Li J, Li H, Jakobsson M, Li SEN, Sjödin PER, Lascoux M. 2012.** Joint analysis of demography and selection in population genetics: where do we stand and where could we go? *Molecular Ecology* **21**: 28–44.

**Liu S, Cornille A, Decroocq S, Tricon D, Chague A, Eyquard J-P, Liu W-S, Giraud T, Decroocq V. 2019.** The complex evolutionary history of apricots: species divergence, gene flow and multiple domestication events. *Molecular Ecology* **28**: 5299–5314.

**Loiselle BA, Sork VL, Nason J, Graham C. 1995.** Spatial genetic structure of a tropical understory shrub, *Psychotria officinalis* (Rubiaceae). *American Journal of Botany* **82**: 1420–1425.

**Migicovsky Z, Gardner KM, Richards C, Chao CT, Schwaninger HR, Fazio G, Zhong G-Y, Myles S. 2021.** Genomic consequences of apple improvement. *Horticulture Research* **8**: 1–13.

**Myles S, Boyko AR, Owens CL, Brown PJ, Grassi F, Aradhya MK, Prins B, Reynolds A, Chia J-M, Ware D, et al. 2011.** Genetic structure and domestication history of the grape. *PNAS* **108**: 3530–3535.

**Nicotra AB, Atkin OK, Bonser SP, Davidson AM, Finnegan EJ, Mathesius U, Poot P, Purugganan MD, Richards CL, Valladares F, et al. 2010.** Plant phenotypic plasticity in a changing climate. *Trends in Plant Science* **15**: 684–692.

**Nosil P, Funk DJ, Ortiz-barrientos D. 2009.** Divergent selection and heterogeneous genomic divergence. *Molecular Ecology* **18**: 375–402.

**Oksanen J, Blanchet FG, Kindt R, Legendre P, Minchin PR, O'Hara RB, Simpson GL, Solymos P, Stevens MHH, Wagner H. 2014.** *Vegan: Community ecology package*.

**Olvera-Vazquez SG, Alhmedi A, Miñarro M, Shykoff JA, Marchadier E, Rousselet A, Remoué C, Gardet R, Degraeve A, Robert P, et al. 2021.** Experimental test for local adaptation of the rosy apple aphid (*Dysaphis plantaginea*) to its host (*Malus domestica*) and to its climate in Europe. *PCI Ecology Pre-registration version*.

**Orsini L, Vanoverbeke J, Swillen I, Mergeay J, De Meester L. 2013.** Drivers of population genetic differentiation in the wild: isolation by dispersal limitation, isolation by adaptation and isolation by colonization. *Molecular Ecology* **22**: 5983–5999.

**Parisod C. 2021.** Plant speciation in the face of recurrent climate changes in the Alps. *Alpine Botany*.

**Peace CP, Bianco L, Troglio M, van de Weg E, Howard NP, Cornille A, Durel C-E, Myles S, Migicovsky Z, Schaffer RJ, et al. 2019.** Apple whole genome sequences: recent advances and new prospects. *Horticulture Research* **6**: 59.

**Peres-Neto PR, Legendre P, Dray S, Borcard D. 2006.** Variation partitioning of species data matrices: estimation and comparison of fractions. *Ecology* **87**: 2614–2625.

**Petit RJ, Hampe A. 2011.** Some evolutionary consequences of being a tree. *Annu. Rev. Ecol. Evol. Syst.* **37**: 187–214.

**Pinheiro J, Bates D, R Core Team. 2022.** *nlme: Linear and Nonlinear Mixed Effects Models*.

**Pritchard JK, Stephens M, Donnelly P. 2000.** Inference of population structure using multilocus genotype data. *Genetics* **155**: 945–959.

**Puechmaille SJ. 2016.** The program structure does not reliably recover the correct population structure when sampling is uneven: subsampling and new estimators alleviate the problem. *Molecular Ecology Resources* **16**: 608–627.

**Pyhäjärvi T, Kujala ST, Savolainen O. 2011.** 275 years of forestry meets genomics in *Pinus sylvestris*. *Evolutionary Applications* **n/a**.

**Pyhäjärvi T, Salmela MJ, Savolainen O. 2008.** Colonization routes of *Pinus sylvestris* inferred from distribution of mitochondrial DNA variation. *Tree Genetics & Genomes* **4**: 247–254.

**Radford PJ. 1967.** Growth Analysis Formulae - Their Use and Abuse1. *Crop Science* **7**: crops1967.0011183X000700030001x.

**Ramírez-Valiente JA, Center A, Sparks JP, Sparks KL, Etterson JR, Longwell T, Pilz G, Cavender-Bares J. 2017.** Population-Level Differentiation in Growth Rates and Leaf Traits in Seedlings of the Neotropical Live Oak *Quercus oleoides* Grown under Natural and Manipulated Precipitation Regimes. *Frontiers in Plant Science* **8**: 585.

**Riordan EC, Gugger PF, Ortego J, Smith C, Gaddis K, Thompson P, Sork VL. 2016.** Association of genetic and phenotypic variability with geography and climate in three southern California oaks. *American Journal of Botany* **103**: 73–85.

**Ripetti V, Escoute J, Verdeil JL, Costes E. 2008.** Shaping the shoot: the relative contribution of cell number and cell shape to variations in internode length between parent and hybrid apple trees. *Journal of Experimental Botany* **59**: 1399–1407.

**Savolainen O, Lascoux M, Merila J. 2013.** Ecological genomics of local adaptation. *Nat Rev Genet* **14**: 807–820.

**Shafer ABA, Wolf JBW. 2013.** Widespread evidence for incipient ecological speciation: a meta-analysis of isolation-by-ecology. *Ecology letters* **16** **7**: 940–50.

**Sork VL. 2018.** Genomic Studies of Local Adaptation in Natural Plant Populations. *Journal of Heredity* **109**: 3–15.

**Svenning J-C, Eiserhardt WL, Normand S, Ordonez A, Sandel B. 2015.** The Influence of Paleoclimate on Present-Day Patterns in Biodiversity and Ecosystems. *Annual Review of Ecology, Evolution, and Systematics* **46**: 551–572.

**Tiffin P, Ross-Ibarra J. 2014.** Advances and limits of using population genetics to understand local adaptation. *Trends in Ecology & Evolution* **29**: 673–680.

**de Villemereuil P, Gaggiotti OE, Goudet J. 2020.** Common garden experiments to study local adaptation need to account for population structure. *Journal of Ecology* **n/a**.

**de Villemereuil P, Gaggiotti OE, Mouterde M, Till-Bottraud I. 2016.** Common garden experiments in the genomic era: new perspectives and opportunities. *Heredity* **116**: 249–254.

**Visscher PM, Goddard ME. 2015.** A General Unified Framework to Assess the Sampling Variance of Heritability Estimates Using Pedigree or Marker-Based Relationships. *Genetics* **199**: 223–232.

**Wang IJ, Bradburd GS. 2014.** Isolation by environment. *Molecular Ecology* **23**: 5649–5662.

**Warschefsky EJ, von Wettberg EJB. 2019.** Population genomic analysis of mango (*Mangifera indica*) suggests a complex history of domestication. *New Phytologist* **222**: 2023–2037.

**Wheelwright NT, Keller LF, Postma E. 2014.** The effect of trait type and strength of selection on heritability and evolvability in an island bird population. *Evolution* **68**: 3325–3336.

**Wright S. 1943.** Isolation by distance. *Genetics* **28**: 114–138.

**Yamada T, Kokubugata G, Fujii S, Chen C-F, Asakawa A, Ito T, Maki M. 2021.** Refugia during the last glacial period and the origin of the disjunct distribution of an insular plant. *Journal of Biogeography* **48**: 1460–1474.

**Zhang H, Mittal N, Leamy LJ, Barazani O, Song B-H. 2017.** Back into the wild—Apply untapped genetic diversity of wild relatives for crop improvement. *Evolutionary Applications* **10**: 5–24.

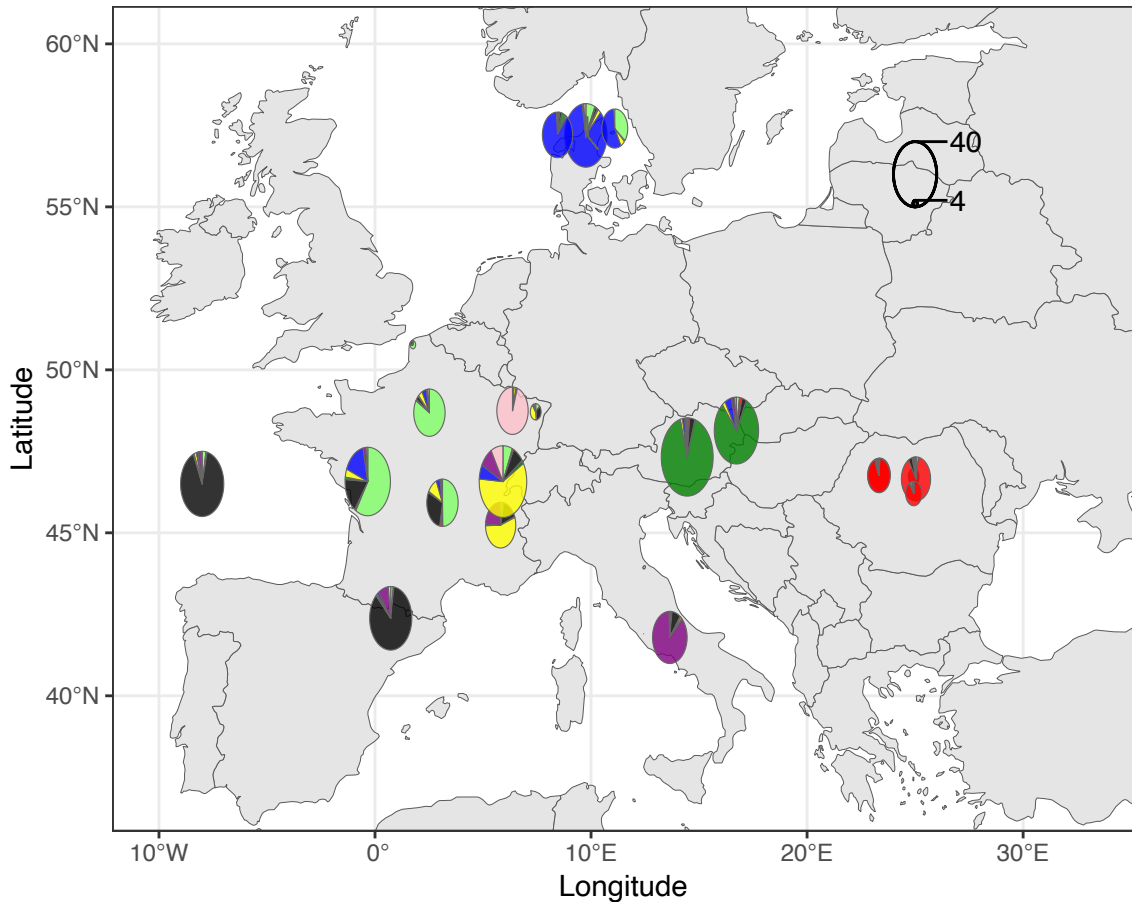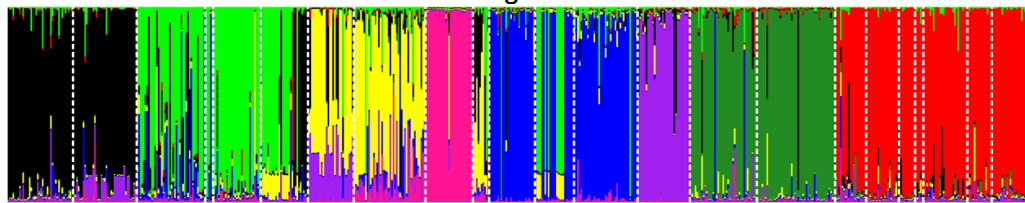

*Malus domestica*

Spain

Western France

Eastern France

Denmark

Italy

Austria

Romania

# Evolution of height over time

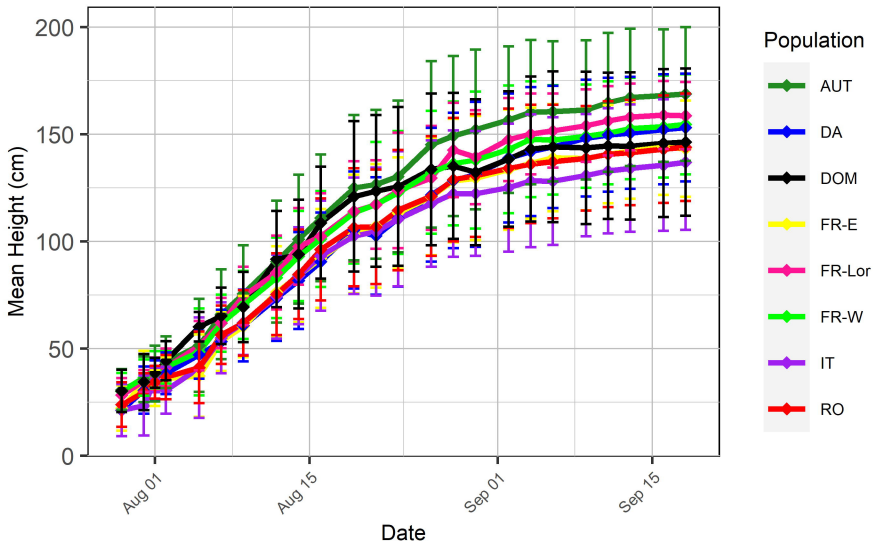



## Variance partitioning of the db-RDA results

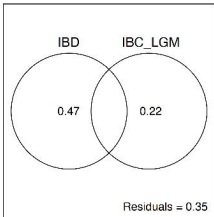

Values <0 not shown
